# Supplementary material for: Studies on the Reactivity of (9-Methyl-5,6-dihydronaphtho[1′,2′:4,5]-thieno[2,3-d]pyrimidin-11-yl)hydrazine Towards Some Reagents for Biological Evaluation
Source: PubMed Central journal article supplement (PMC3002830; doi:10.3797/scipharm.0910-11), 2009-12-11
Supplement: scipharm.2010.78.1_supp_info.pdf [file scipharm.2010.78.1_supp_info.pdf]

## Supporting Information to

**Studies on the Reactivity of  
(9-Methyl-5,6-dihydronaphtho[1',2':4,5]-  
thieno[2,3-*d*]pyrimidin-11-yl)hydrazine  
Towards Some Reagents for  
Biological Evaluation**

**Aymn E. RASHAD, Ahmed H. SHAMROUKH, Randa E. ABEL-MEGEID,  
Hayam H. SAYED, Nyera M. ABEL-WAHED**

Published in Sci Pharm. 2010; 78: 1–12

doi:10.3797/scipharm.0910-11

Available from: <http://dx.doi.org/10.3797/scipharm.0910-11>

© Rashad *et al.*; licensee Österreichische Apotheker-Verlagsgesellschaft m. b. H., Vienna, Austria.

This is an Open Access article distributed under the terms of the Creative Commons Attribution License (<http://creativecommons.org/licenses/by/3.0/>), which permits unrestricted use, distribution, and reproduction in any medium, provided the original work is properly cited.

### Table of Contents

- Fig. S1. <sup>1</sup>H NMR spectrum of compound **2**.
- Fig. S2. <sup>13</sup>C NMR spectrum of compound **2**.
- Fig. S3. <sup>1</sup>H NMR spectrum of compound **4**.
- Fig. S4. <sup>13</sup>C NMR spectrum of compound **4**.
- Fig. S5. <sup>13</sup>C NMR spectrum of compound **7**.

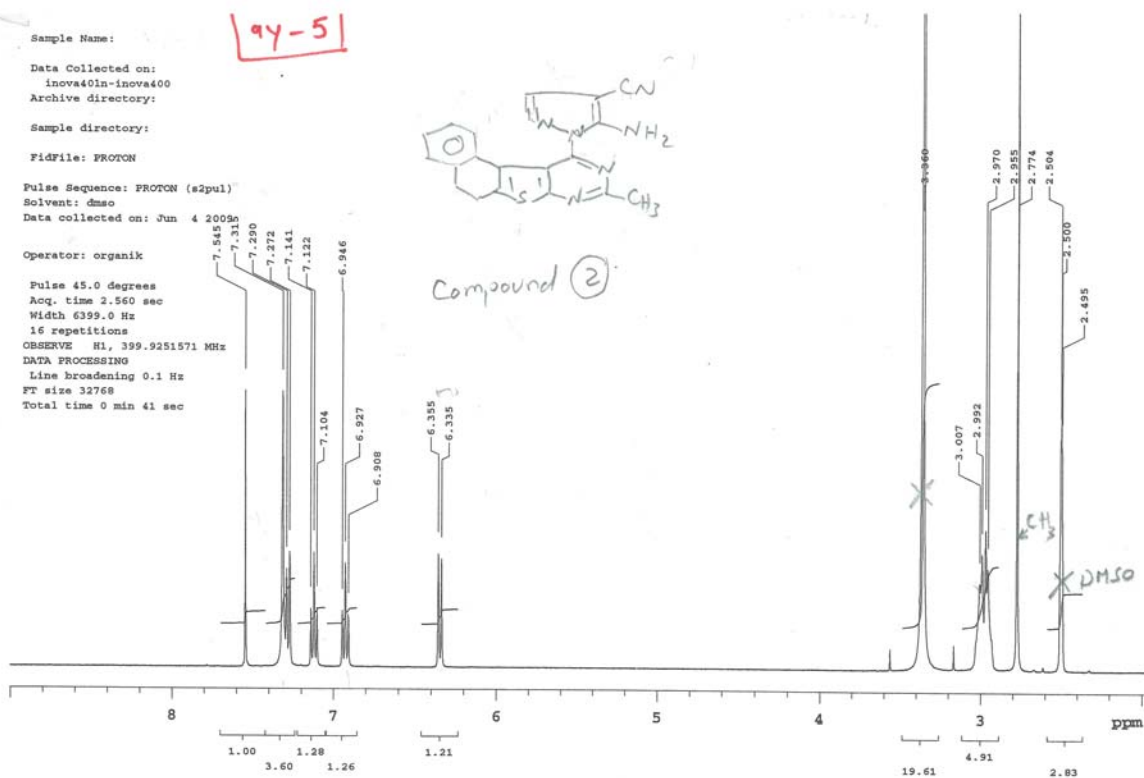

Fig. S1.  $^1\text{H}$  NMR spectrum of compound 2.

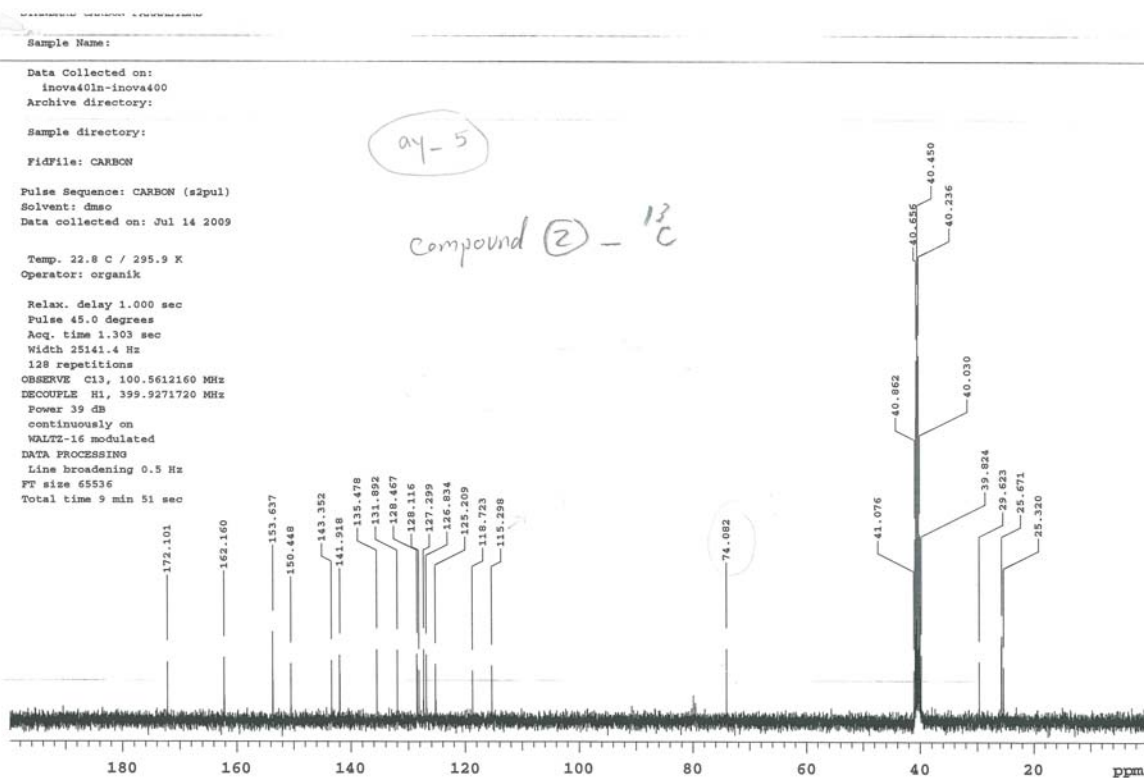

Fig. S2.  $^{13}\text{C}$  NMR spectrum of compound 2.

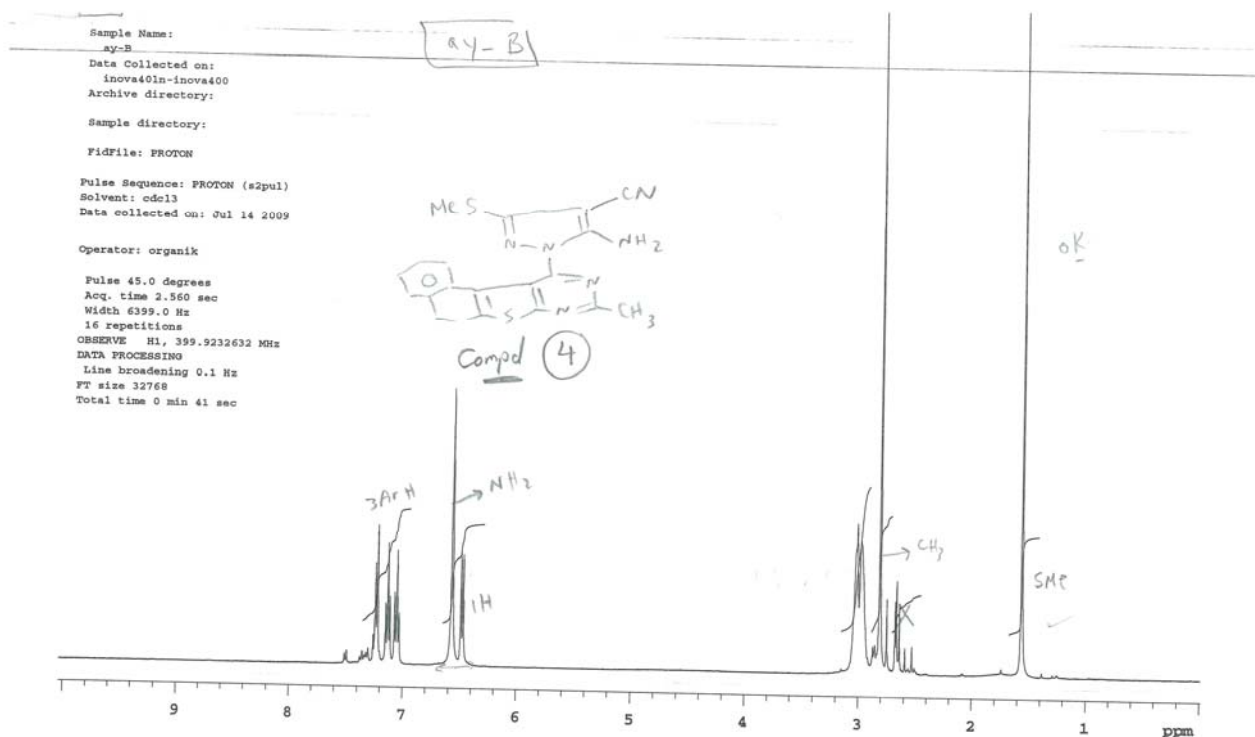Fig. S3. <sup>1</sup>H NMR spectrum of compound 4.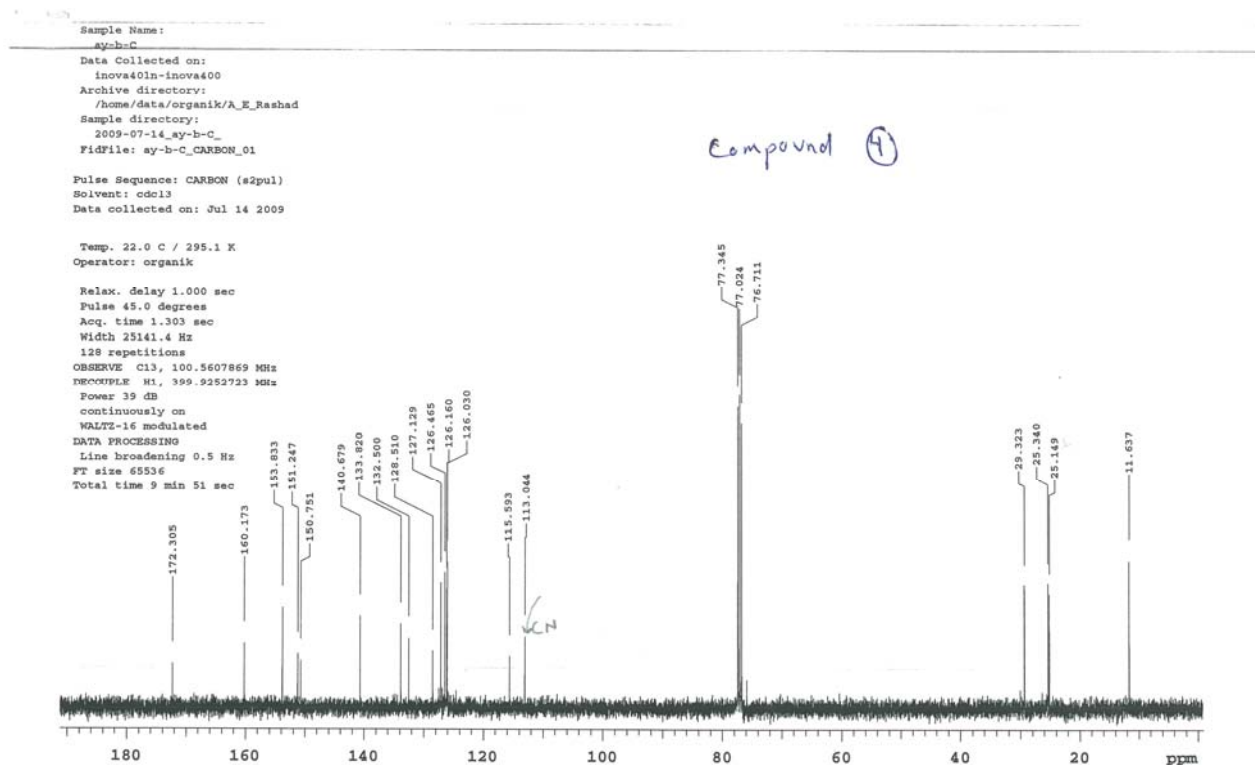Fig. S4. <sup>13</sup>C NMR spectrum of compound 4.

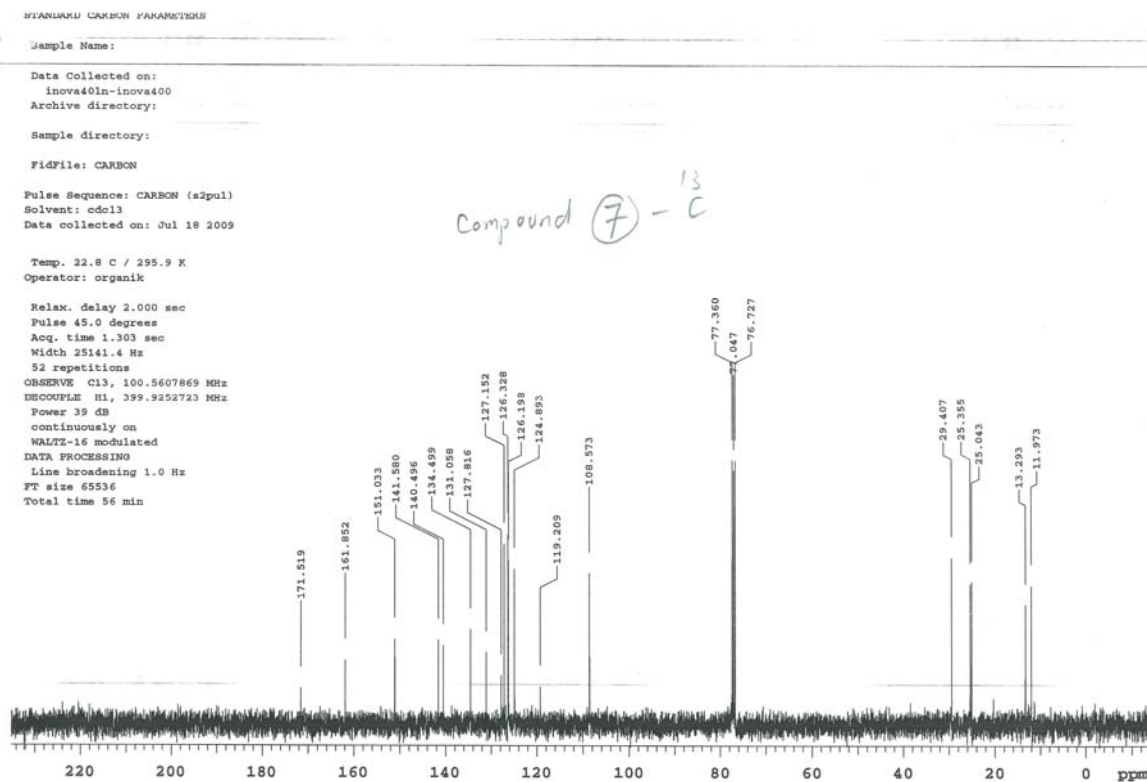

Fig. S6. <sup>13</sup>C NMR spectrum of compound 7.
